# Supplementary material for: Bloodstream infections caused by Klebsiella pneumoniae: prevalence of blaKPC, virulence factors and their impacts on clinical outcome
Source: PubMed Central journal article supplement (PMC6069789; doi:10.1186/s12879-018-3263-x), 2018-07-31
Supplement: 12879_2018_3263_MOESM3_ESM.pdf [file 12879_2018_3263_MOESM3_ESM.pdf]

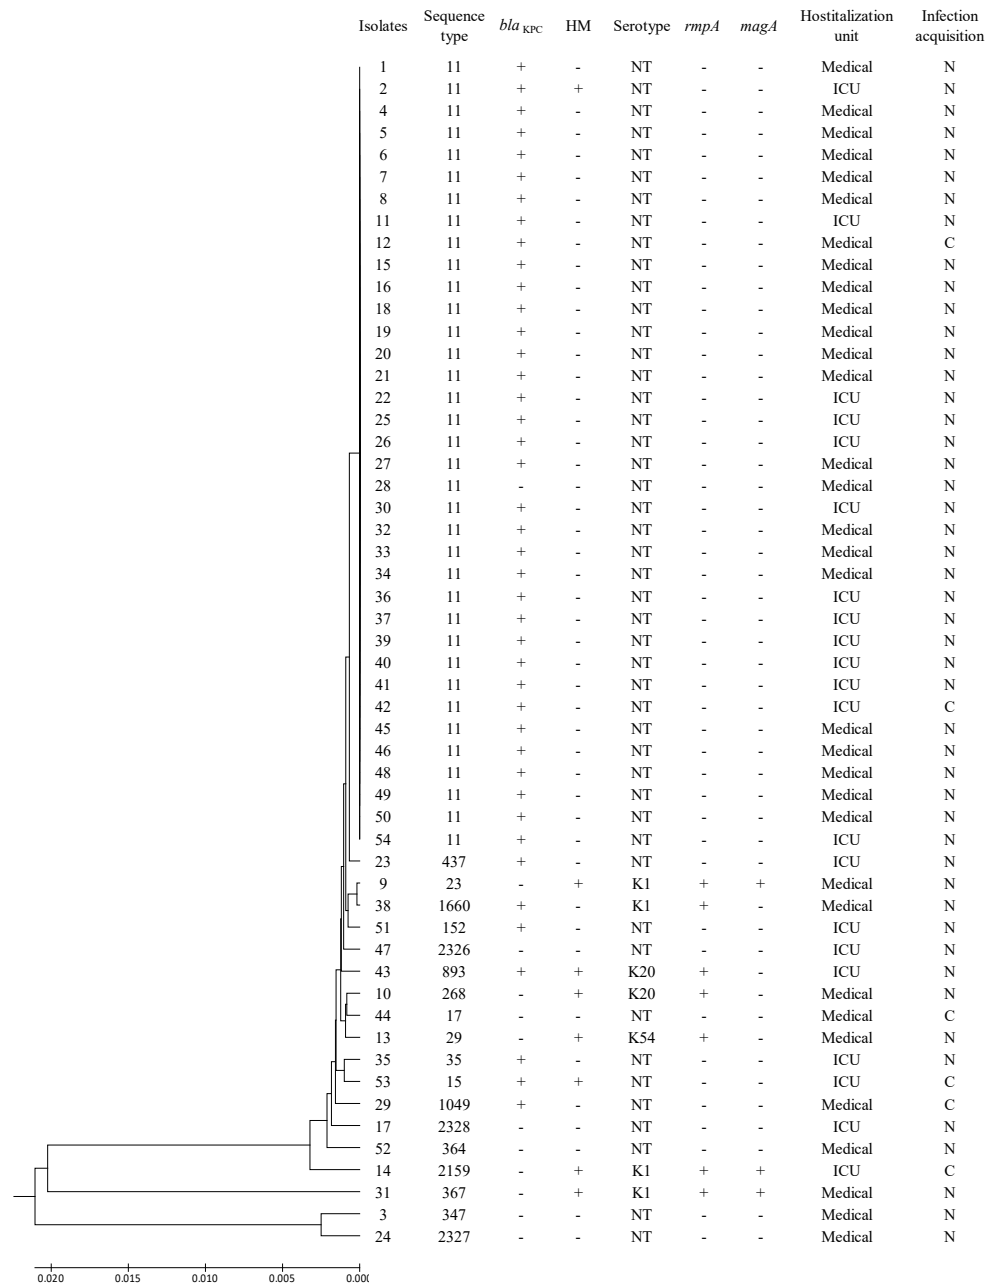

Figure S1. Characteristics of 54 *K. pneumoniae* isolates from the non-survival subgroup. The unweighted paired group mean analysis (UPGMA) dendrogram was constructed using the concatenated sequence of MLST. HM, hypermucoviscous; NT, non-typed; C, community; N, nosocomial.
